# Supplementary material for: The European Union and Azerbaijan Relations
Source: MDPI journal article supplement (doi:10.3390/cells10113159), 2013-02-20
Supplement: s1 [file s1]

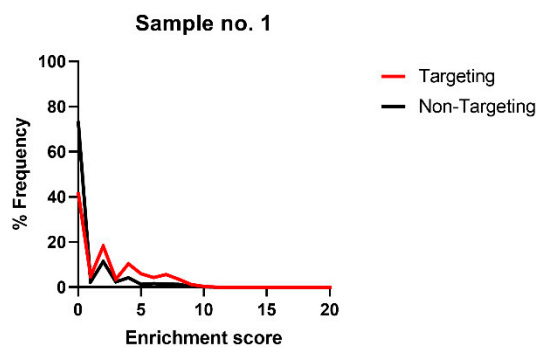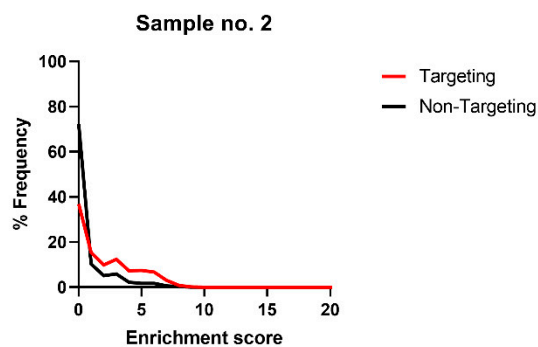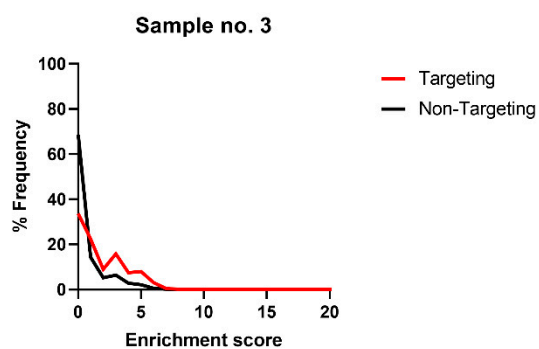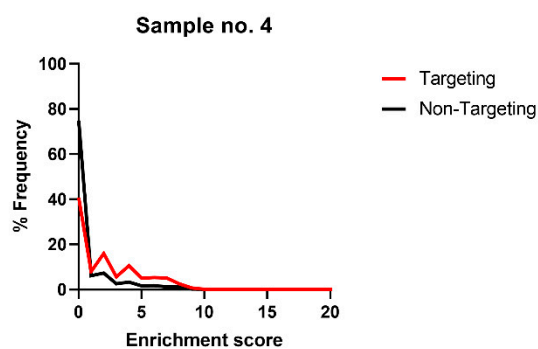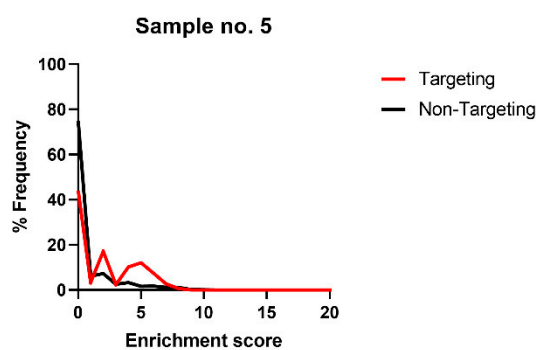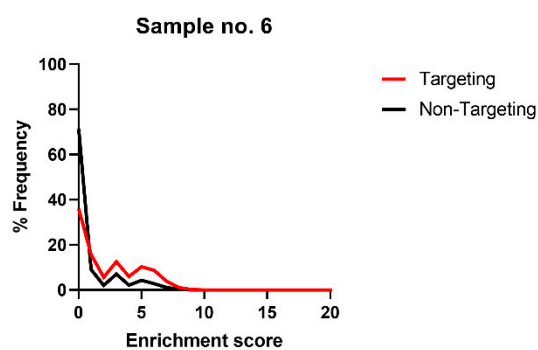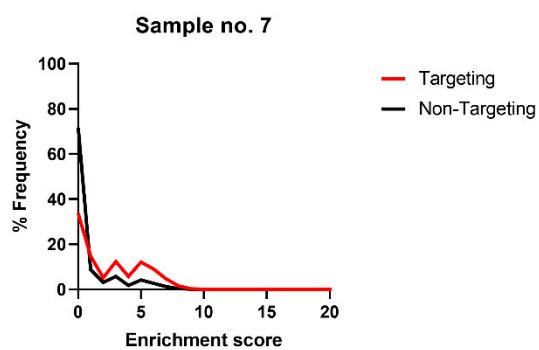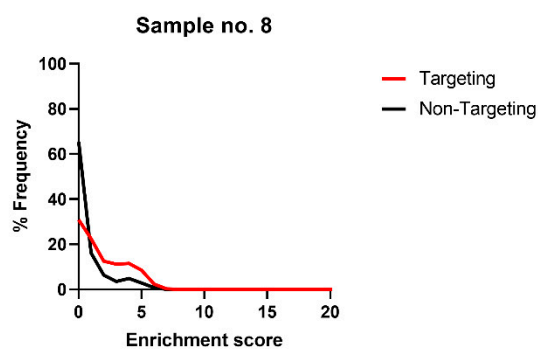

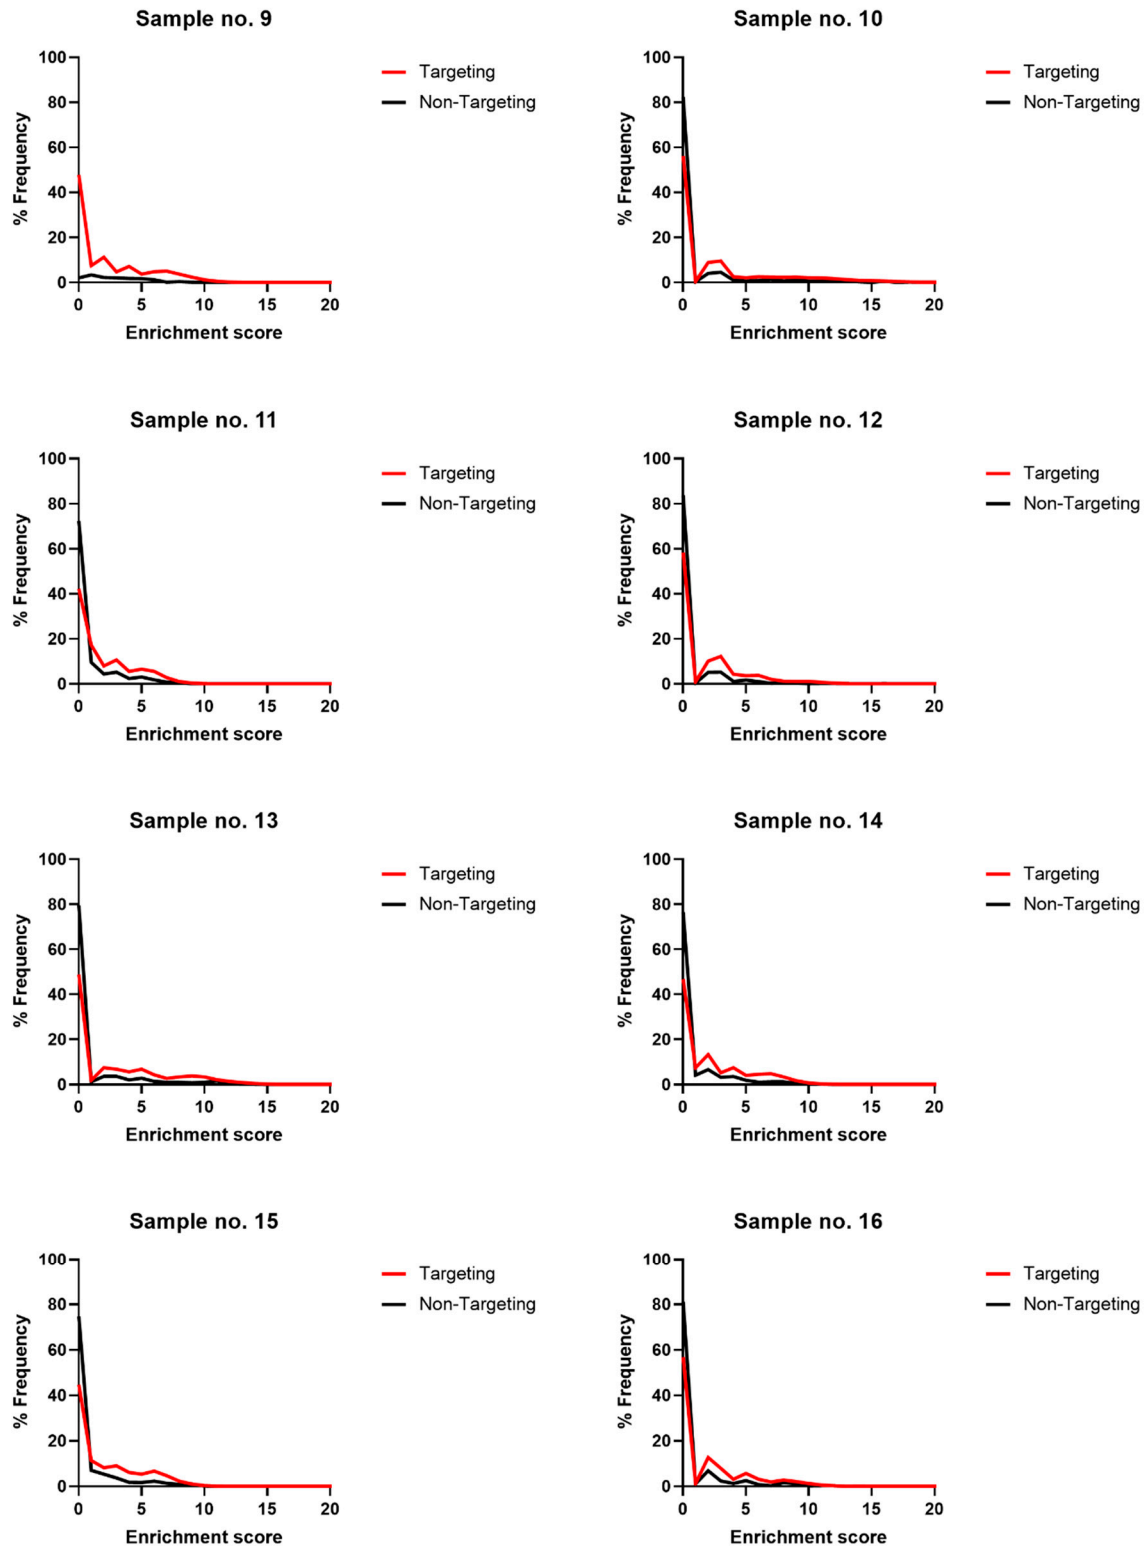

**Supplementary Figure S1.** Panels show density plots of normalized abundances for all sixteen samples for targeted (red) and non-targeted (black) sgRNAs, respectively, proving normalization performance and showing that for all cases there is a set of genes where enrichment score (x-axis) exceeds levels for non-targeting controls
