# Supplementary material for: The European Union and Azerbaijan Relations
Source: MDPI journal article supplement (doi:10.3390/cells10113159), 2013-02-20
Supplement: s1 [file s1]

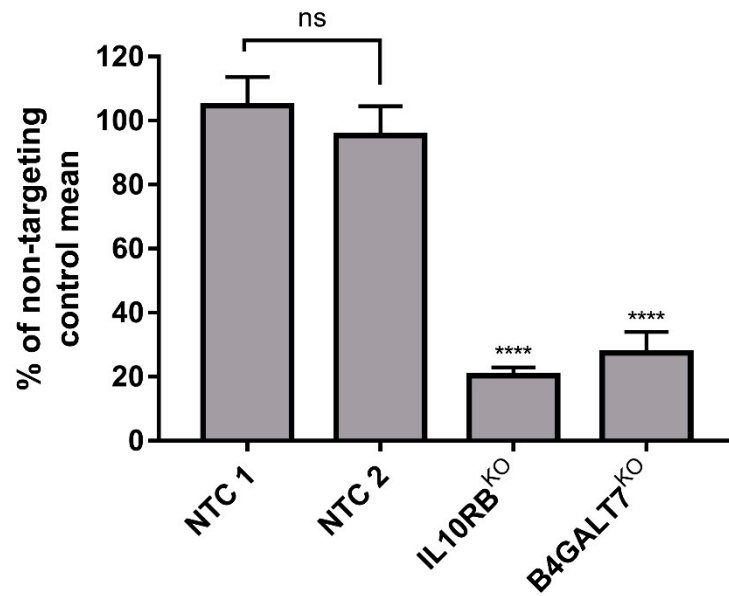

**Supplementary Figure S1. SARS-CoV-2 replication in modified HeLa<sup>ACE2</sup> cells.** SARS-CoV-2 replication was evaluated in modified HeLa<sup>ACE2</sup> cells transduced with vectors harboring the template for sgRNA knockouts of *IL10RB* and *B4GALT7* genes. Two sgRNAs non-targeting any sequence in the genome were used as a control (NTC). Inhibition of viral infection was assessed 48 hours p.i. by RT-qPCR, data were normalized and presented as % of the NTC number of viral RNA copies/ml. Data are presented as a mean  $\pm$  SEM from three independent experiments, each performed in triplicate or quadruplicate. Data were analyzed with Shapiro-Wilk and Brown-Forsythe tests. To determine the significance of differences between compared groups, one-way ANOVA with post hoc Dunnett's test was used. Values statistically significant are indicated by asterisks: \*\*\*\*p < 0.0001.
