# Supplementary material for: The European Union and Azerbaijan Relations
Source: MDPI journal article supplement (doi:10.3390/cells10113159), 2013-02-20
Supplement: s1 [file s1]

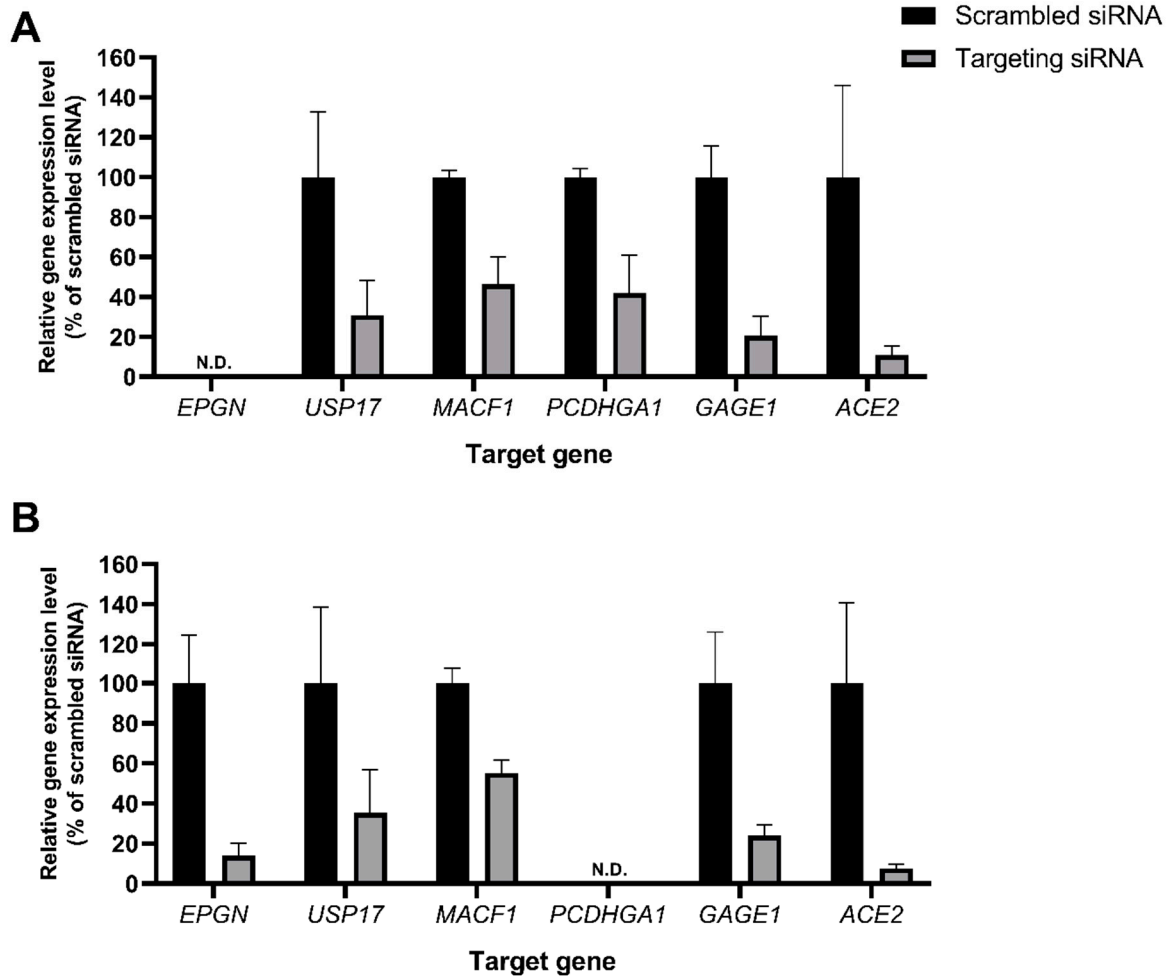

**Supplementary Figure S2. Analysis of siRNA gene silencing efficiency.** qPCR analysis of relative expression levels of EPGN, USP17, MACF1, PCDHGA1, GAGE1, and ACE2 in modified A549<sup>ACE2/TMPRSS2</sup> (A) and HeLa<sup>ACE2</sup> (B). At 48 h following the first siRNA transfection, the cells were harvested and analyzed. RNA was isolated and subjected to RT-qPCR. Scrambled siRNA was used as a control. All data were normalized to GAPDH expression level and are presented as relative gene expression level (% of scrambled siRNA relative gene expression level). Data are presented as a mean  $\pm$  SEM from two independent experiments performed in triplicates or quadruplicates. N.D. – Non detected.
